# Supplementary material for: Three-dimensional nanocomposite formed by hydrophobic multiwalled carbon nanotubes threading titanium dioxide as the counter electrode of enhanced performance dye-sensitized solar cells
Source: Royal Society of Chemistry journal article supplement (doi:10.1039/c6ra06705k), 2016-01-01
Supplement: c6ra06705k1.pdf [file c6ra06705k1.pdf]

## Supporting Information

### **Three-dimensional nanocomposite formed by hydrophobic multiwalled carbon nanotubes threading titanium dioxide for counter electrode of enhanced performance dye-sensitized solar cells**

Zhichun Yang, Waqar Ahmad, Liang Chu, Majid Raissan Al-bahrani, Fanfan Tu, Yumei Wang,

Hang Zhang, Xi Wang, Jun Su, Nishuang Liu, Luying Li, Changping Yang & Yihua Gao

In our study, we doped  $\text{TiO}_2$  with different amount (10%, 20% and 30%) in MWCNTs for the optimum performance of DSSCs. The nanocomposite counter electrode (CE) which contain 20%  $\text{TiO}_2$  showed the highest efficiency for DSSCs. The FE-SEM images Fig. S1 (a) & (b) show that the nanocomposite containing 10%  $\text{TiO}_2$  threaded by MWCNTs have not tightly assembled. Furthermore, Fig. S1(c) & (d) exhibit that the  $\text{TiO}_2$  nanoparticle dispersed irregularly. The power conversion performances of our as-prepared samples (10%, 20% and 30%) are shown in Fig. S2 and their corresponding photovoltaic parameters are tabulated in Table S1. Fig. S3(a) presents a FE-SEM image of the pristine MWCNTs which were applied for building 3D threaded architectures. The diameter and length was found to be 30-50 nm and 10-20  $\mu\text{m}$ , respectively. The surface morphology of our synthesized  $\text{TiO}_2$  was shown in Fig. S3(b) and its diameter is 25 nm. As shown in Fig. 3(c) & 3(d), the film thickness of photoanode and our nanocomposite CE (20%  $\text{TiO}_2$ ) were found to be 13.70  $\mu\text{m}$  and 11.95  $\mu\text{m}$  respectively. Fig. S4 is EDX mapping to characterize the distribution of various elements in nanocomposite. Fig. S5 depicts the lower peak-to-peak separation ( $E_{pp}$ ) value of our as-prepared (MWCNTs/ $\text{TiO}_2$ ) CE than MWCNTs and conventional

Pt CE. The obtained results indicate excellent catalytic reversibility towards the reduction of  $I_3^-$  due to the introduction of  $TiO_2$  into MWCNTs. The BET surface area ( $114.05334\text{ m}^2/\text{g}$ ) and the nitrogen adsorption isotherms of pristine MWCNTs were measured (See in Fig. S6) by a  $N_2$  adsorption isotherm at 77 K with a BET analyzer (JW-BK122W, Beijing JWGB Sci.&Tech.Co.,Ltd.).

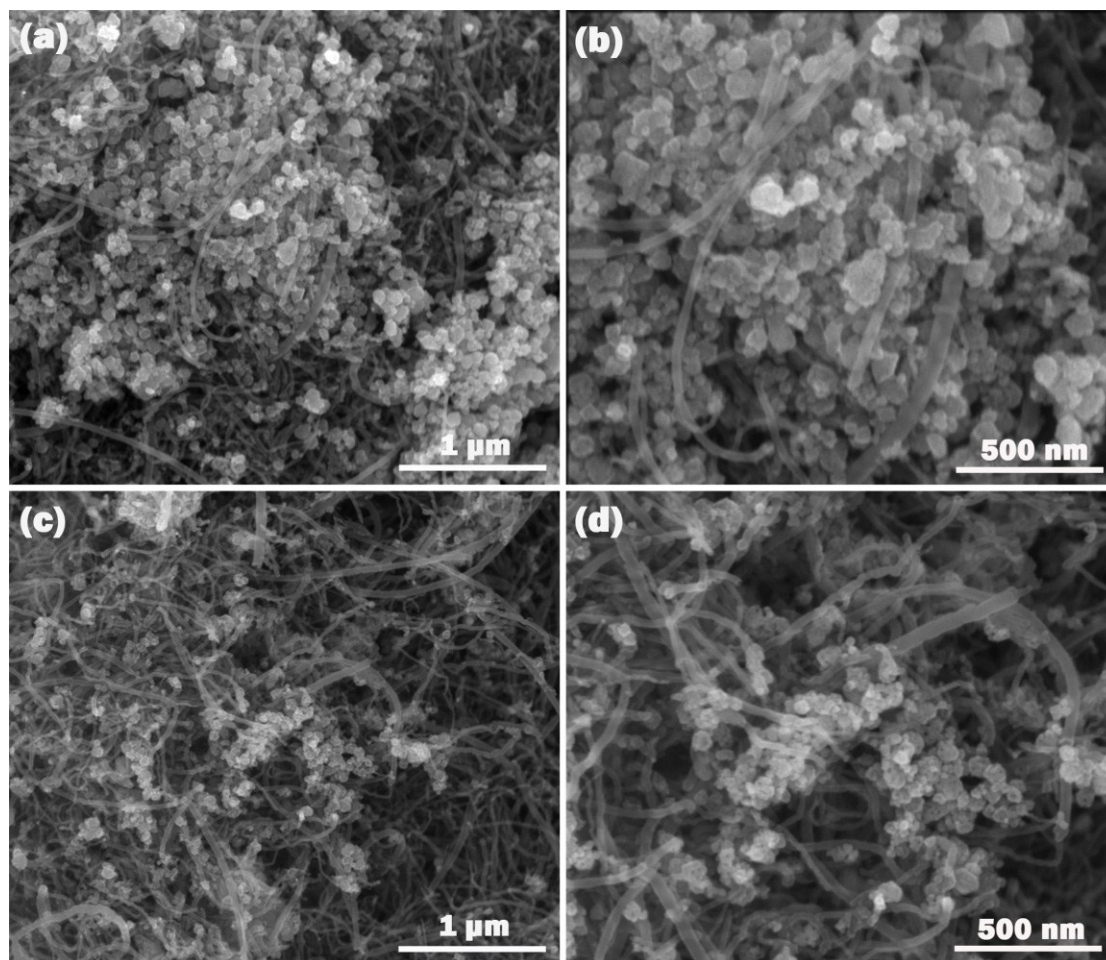

**Figure S1.** SEM images of (a) 10%  $TiO_2$  and (b) the high resolution image of 10%  $TiO_2$ . (c) 30%  $TiO_2$  and (d) the high resolution image of 30%  $TiO_2$ .

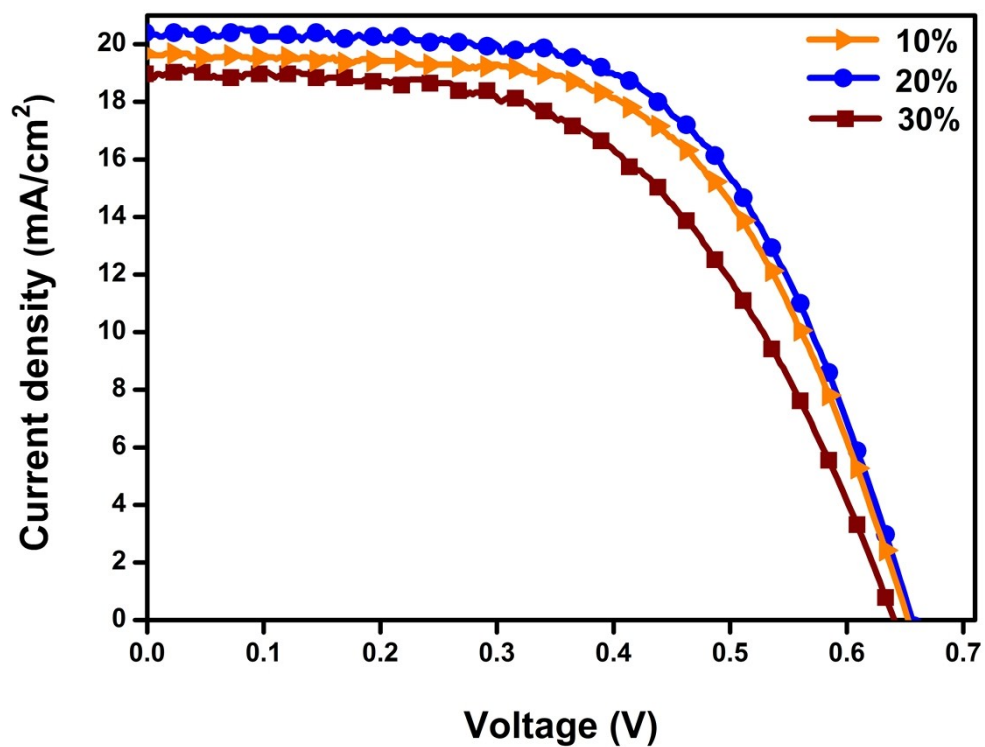

**Figure S2.** J-V curves for nanocomposite CEs with different percentage of TiO<sub>2</sub>.

**Table S1.** Photovoltaic performance of nanocomposite CEs with different percentage of TiO<sub>2</sub>.

| Percentage | J <sub>sc</sub> (mA/cm <sup>2</sup> ) | V <sub>oc</sub> (V) | FF   | PCE (%) |
|------------|---------------------------------------|---------------------|------|---------|
| 10%        | 19.5                                  | 0.66                | 0.58 | 7.56    |
| 20%        | 20.1                                  | 0.66                | 0.60 | 7.95    |
| 30%        | 18.9                                  | 0.64                | 0.55 | 6.61    |

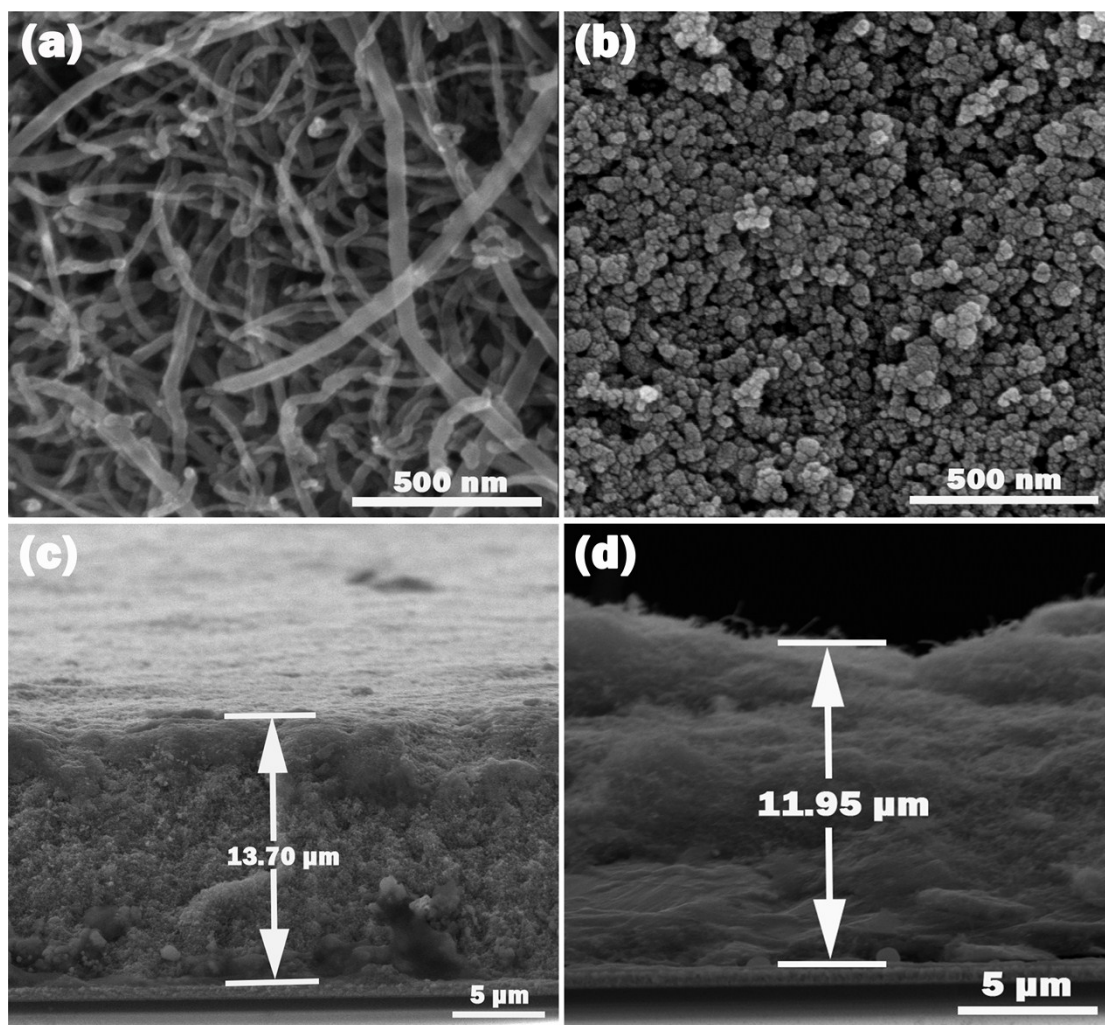

**Figure S3.** SEM images of (a) MWCNTs (b) TiO<sub>2</sub> synthesised by hydrothermal method (c) thickness of photoanode for DSSCs. (d) thickness of nanocomposite CE fabricated with the method of doctor-blading.

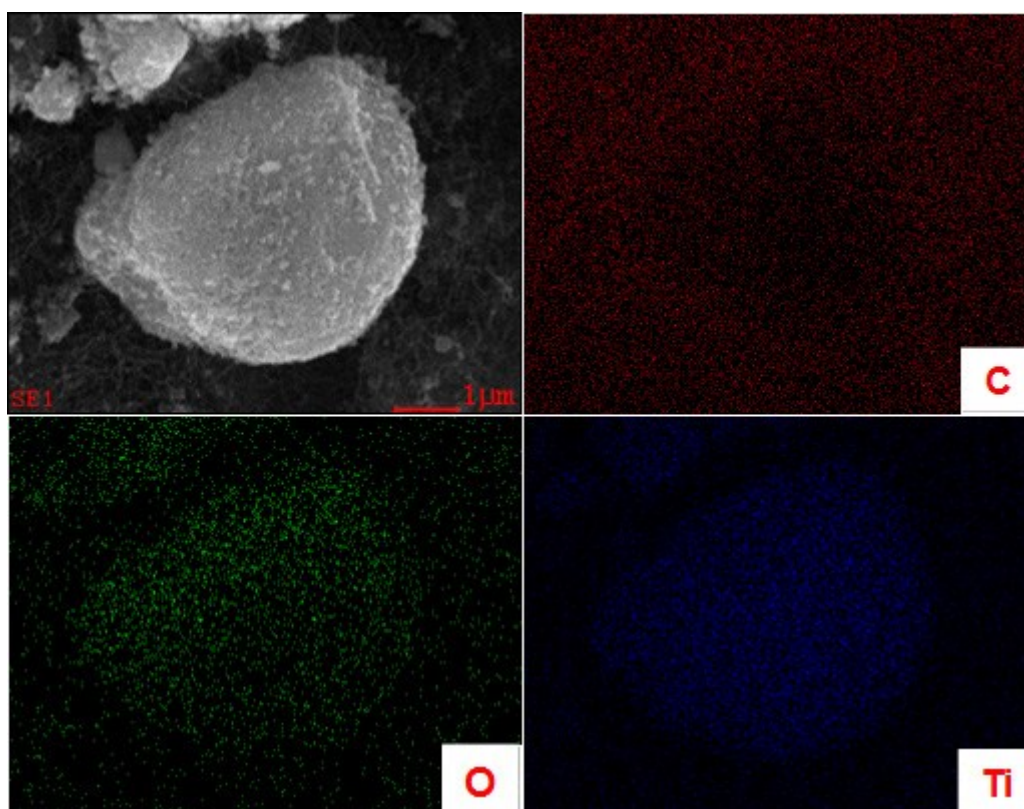

**Figure S4.** EDX mapping images for selected assembly of nanocomposite.



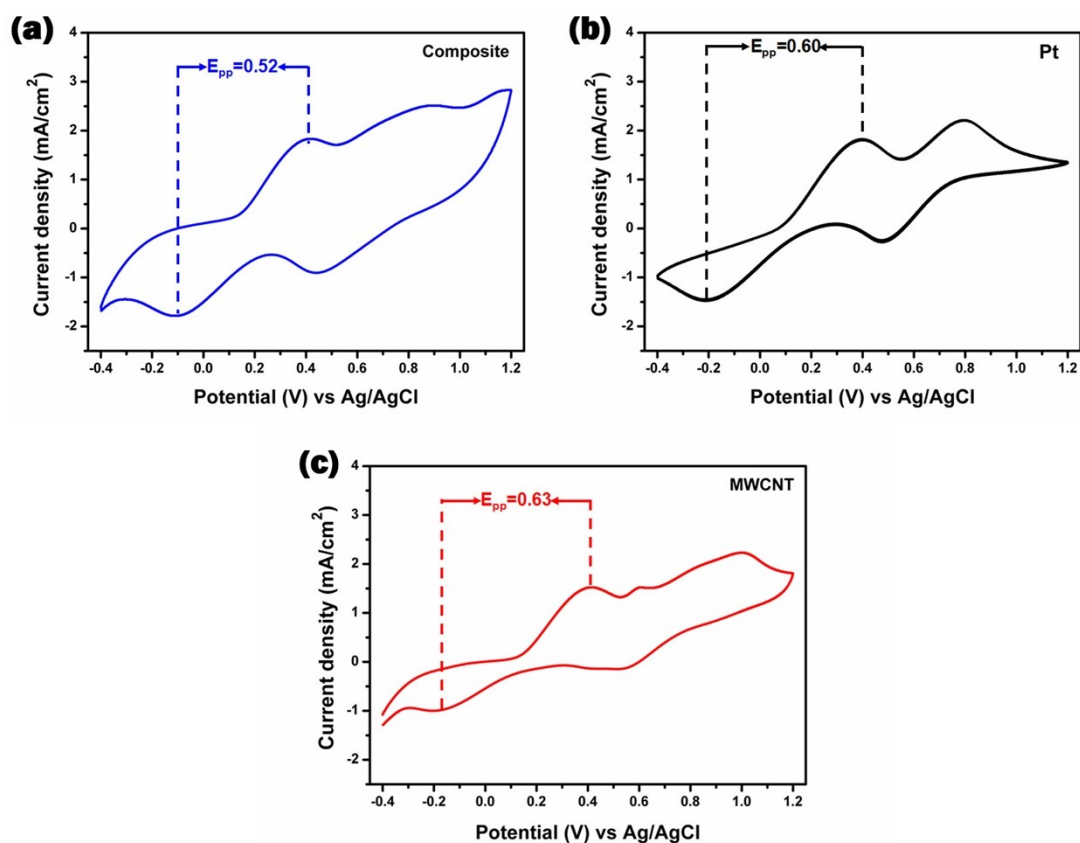

Figure S5. Cyclic voltammetry (CV) curves (peak-to-peak separation).

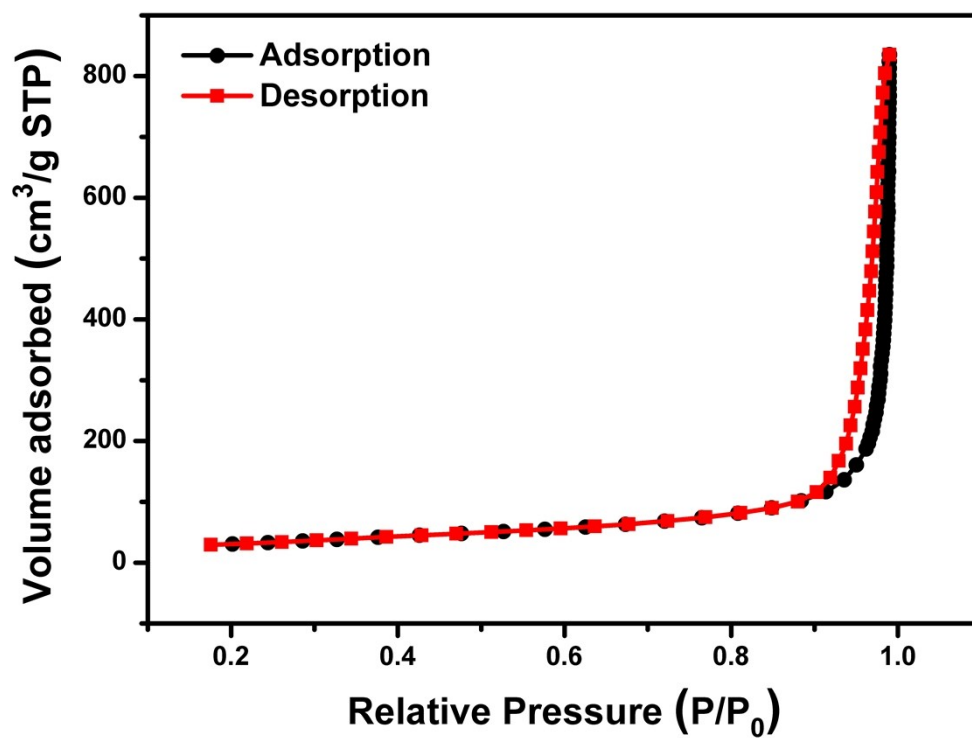

Figure S6. Nitrogen adsorption isotherms of pristine MWCNTs.
